# Supplementary material
Source: MDPI journal article supplement (https://www.mdpi.com/2227-9717/10/2/291)
Supplement: s1 [file s1]

Archive with 9 entries (9 files):
- FigS1.tif
- SupplementaryInformationLegends.pdf
- SupplementaryTable1.xlsx
- SupplementaryTable2.xlsx
- SupplementaryTable3.xlsx
- SupplementaryTable4.xlsx
- SupplementaryTable5.xlsx
- SupplementaryTable6.xlsx
- SupplementaryTable7.xlsx
