# Supplementary material
Source: MDPI journal article supplement (https://www.mdpi.com/2227-9717/10/2/291)
Supplement: s1 [file s1 › SupplementaryInformationLegends.pdf]

## **Supplementary Information**

### **Supplementary Tables Legends**

**Table 1:** Bacterial targeted reviewed human proteins.

**Table 2:** Viral targeted reviewed human proteins.

**Table 3:** Top GO IDs for bacterial and viral targeted human proteins.

**Table 4:** Full table of features wise performance measures on bacterial and viral targeted human proteins.

**Table 5:** Full table of selected feature-wise performance measures of bacterial and viral targeted human proteins.

**Table 6:** Probability score of top 100 bacteria targeted human proteins.

**Table 7:** Probability score of top 100 virus targeted human proteins.

### **Supplementary Figures Legends**

**Figure S1:** Venn diagram of Gene Ontology (GO) IDs of bacteria- and virus-targeted human proteins.
