# Supplementary material
Source: MDPI journal article supplement (https://www.mdpi.com/2227-9717/10/2/291)
Supplement: s1 [file s1 › SupplementaryTable1.xlsx]

## Sheet: Sheet1
Bacterial targeted reviewed human proteins human proteins
UniprotID
Q96FW1
P45985
O43491
Q5R372
Q12882
Q8N3D4
Q13352
P42226
Q9BUH6
P09488
Q9Y3C0
Q02410
Q96Q15
Q9BX97
Q8N3S3
Q12841
Q5BKZ1
P30520
Q10587
Q3YBR2
Q4VX76
Q9UNH7
Q9BYB0
Q16181
Q6ZNA4
Q9H0Z9
Q9P267
O95382
O15033
Q9UBN7
Q96RU3
P15036
O00748
Q9H9A5
O94864
P17031
Q68DK7
Q5TAX3
P21246
Q9ULJ1
P59901
Q8N9T8
Q68DE3
P31785
Q8IY31
Q86XS8
Q5RKV6
O75629
P17927
Q96F05
Q7L3B6
Q8WUW1
Q8IXX5
Q6NX49
P55851
P48995
Q8NDV7
Q04727
Q9UJW9
O00193
Q8TB24
Q9Y5P3
Q86XR2
Q8TF39
O75626
Q96BP3
O94921
P28328
O15438
Q99685
O95777
P41229
P14902
Q16534
P09211
Q8TDU6
P34897
Q9Y2X7
Q9HCC8
Q9Y2H6
P24468
P02461
Q8N137
Q9NR00
Q8N8E3
Q9UKZ1
P43155
Q9P291
Q96GX9
Q6UB99
P35611
Q8NFM4
Q9P2E3
Q9NRM2
Q49AG3
Q6AHZ1
Q8IZH2
Q9Y484
Q9Y4P8
Q9BTA9
A5D8V6
Q9ULT0
Q99598
O60637
P07204
O14836
O75365
Q9UPQ9
Q9UKI8
Q04724
P31483
P56279
Q7Z7G0
Q12772
Q8N0X7
Q5M775
Q9UNH6
Q96RL6
Q9P0U3
Q16799
Q92766
Q96AT9
Q7L0R7
P49796
A0AV96
Q86WH2
Q9H6Z4
Q9UK73
Q8N1N5
Q3KNW1
P52758
Q2NL98
Q8TF05
Q01453
Q53GL0
O94827
Q9ULL1
Q9BXM7
Q13492
Q6Y7W6
P16284
Q96G74
P30414
Q969F2
Q9Y6Q9
O95544
Q86UW6
P13640
O60318
Q15555
O95751
Q93100
Q9UEF7
Q96PQ7
P78368
Q96JJ6
O15054
P21399
Q13418
P16871
O14879
P09601
Q01581
Q9H422
Q14469
P00390
Q13588
Q9UKJ3
O94868
P30273
Q9HAH7
Q99814
Q16610
P30046
Q7L591
Q9Y6K1
Q13574
A2RUS2
Q9Y426
Q9H8E8
Q8WU58
Q17RY0
Q92828
P31146
Q05707
P02462
Q9UDT6
Q969X6
P41002
P13501
Q9H2F9
Q9GZT6
P43235
P09871
Q9UKI2
Q9HBK9
O95376
Q12802
Q6ULP2
Q9BR61
Q92685
Q9UGV2
Q8IZ83
Q9BR11
O43309
Q6NXT4
Q8NHG8
O43257
Q05481
P51815
P17036
Q3KP31
Q8N8C0
Q9Y462
Q8N1G0
Q5T5D7
Q96JM2
P59923
Q8N895
Q5VUA4
O60281
P52747
Q8IYN0
Q9UKY1
Q9BQ24
Q7Z3T8
Q15911
O60315
P37275
Q9C0B5
Q9NYG2
Q8IVQ6
Q96K62
Q7Z570
Q96MU7
Q9UM01
Q9BWQ6
O43542
O76076
O43516
Q6ZMY6
Q6PJI9
O75083
Q9UMN6
Q96DN2
Q9H269
Q709C8
Q96RL7
Q86UX7
Q9BTM9
O75385
A0JNW5
Q70EK8
Q9NV66
O43914
P40222
Q8N5M4
A2A3L6
Q6DKK2
Q8WVT3
Q7Z4L5
Q96SJ8
Q16881
Q9C029
O75382
Q96LD4
Q8IYM9
Q14142
O60296
O43399
P20333
Q06643
P50591
Q8N394
Q6UX65
Q9H2L4
O94876
P31314
P29401
Q5JTD0
Q07352
Q02763
Q9NS62
P42765
Q9NPJ3
Q03167
Q92664
Q9NYB0
P20062
Q15170
P01848
Q13207
Q92609
Q9NUY8
O75157
Q96PV0
Q8NBK3
Q13277
O14662
Q13285
Q92783
Q9UJ98
P50225
O94768
Q9UEE5
P10124
Q96JI7
Q9NRA0
Q9UBP0
Q02447
Q07889
Q92673
O60749
Q2TAL5
Q8WU79
Q9NWH9
Q8IYM2
P12755
Q8N196
O43699
O15389
Q9NSC7
O75368
P55822
Q9H792
Q8WV19
O95104
Q13591
Q92854
Q14242
Q8IZQ5
Q8WVN6
O15126
Q9BY50
A3KN83
Q9NQZ2
Q96LT4
Q8IVG5
Q8NBI5
Q9NP59
Q9NRA2
Q92503
Q92736
Q13761
Q86VV8
Q92541
Q96E11
Q9UNE2
Q8TEU7
O75575
O14802
Q9P1U0
Q9HAU8
O60930
P07998
Q8ND24
Q96A37
Q9H9V4
Q96NA2
Q7Z6I6
Q52LW3
Q6ZUM4
P98171
Q3MIN7
P48382
Q13156
Q96R05
Q96A58
Q9HAU5
P51606
Q9H1K0
P51159
Q02833
Q8WWW0
P61224
Q5U651
Q86V87
O60216
O14966
Q9H0N0
Q96AX2
Q6IQ26
Q9Y2K5
Q9H0R6
Q16769
Q9UG01
Q8N5J2
Q9P1U1
Q6ZN54
Q86WJ1
Q96DY7
A5PLN9
Q9BRX5
Q9P2X3
A6NC98
Q9C0D7
Q9HCG1
Q6NTE8
Q9BQ83
Q6GPH4
Q53GL7
Q6UXT9
B0I1T2
Q96HM7
Q7Z5L9
Q8NG08
Q8NFI3
Q8NF67
Q6PJT7
Q6PIY7
Q15751
Q86XI8
Q86VE0
Q16822
Q6ZSS7
P52569
Q7Z2F6
Q8IZD2
Q92619
Q9NVV2
Q15513
Q8IVF1
O75911
Q9NZ71
Q14596
Q5HYW2
O94760
Q6ZSB9
Q9ULD4
Q9HD43
Q0VD83
Q5T4T6
P31939
Q12923
Q03431
Q3KNS1
Q7Z6K3
O60759
O94903
Q8TCU6
Q96QH2
Q9H939
Q9UBT6
Q8TBY8
O43157
Q6P4A8
Q6DJT9
Q8IVE3
Q9H7P9
Q9HB21
O00562
Q9UKJ0
Q8WXW3
Q8WYR1
Q99570
Q8TCD6
O43189
Q9UIL8
P21810
P36871
P16234
Q96BD5
P14222
P56645
P43116
Q5T2W1
Q9P0J1
Q16654
Q9BY77
Q08499
O00408
O14737
O14917
Q8TEW8
P51003
Q504Q3
Q13093
Q9UNF0
Q8IVL5
Q96HP4
Q01804
Q5VV17
Q8IYS5
Q96SU4
Q96SN7
O75807
O60290
Q6ZNJ1
Q5VZ03
Q8NFP7
O75694
O14786
Q02297
Q14994
Q9UFN0
Q9H6W3
Q16517
Q9HBL8
Q8N0W4
Q07444
Q14494
Q0ZGT2
P18615
Q8N660
P0C2Y1
Q6ZS30
Q8NFP9
Q9UHE5
Q8TBE9
P43490
Q9C000
Q9Y3Q0
Q13506
Q9NPC6
Q8N699
Q92614
Q99102
O43312
Q9Y2Z2
Q13615
Q13614
Q13496
O75081
P47224
Q9HCI7
Q9GZW8
O75970
O96007
Q96BY2
P08253
P24844
Q8NEZ4
Q9HBH9
Q969V6
Q8N3F8
O43451
Q9Y4C4
Q5U5Q3
P50221
O00470
Q14814
P21439
Q8IX19
Q5VZF2
Q9NR56
Q96JK9
Q8IZL2
Q86UL8
Q9HCI5
Q6ZN16
O60449
O75427
Q96CN5
P50851
O14494
P09917
P09960
Q9UPQ0
Q9UHB6
Q969G2
Q6ICC9
O43679
Q13094
Q9UIC8
Q13571
P18627
Q8WV93
Q16719
O95198
Q9Y2M5
Q99612
Q13118
Q9H0B6
Q92845
Q14954
Q7Z4H8
P54819
P00568
Q32MH5
Q2KHM9
O60303
O75071
O43310
Q6ZU52
Q6AI39
Q92617
P53990
Q9H9V9
O60271
Q9Y2K7
Q86YT9
Q9NQC1
P26440
Q14573
P26010
Q9BUE6
Q9NPI9
Q14654
Q02556
Q15306
P14316
Q9NV88
Q9UNL4
P17181
P30740
P24394
P14784
Q14005
P01591
P01877
P08069
Q01629
Q8N5X7
O60573
Q16666
O75874
Q02535
Q5TEJ8
Q16270
P18065
O95998
Q9NRM6
P78552
P34913
Q12891
P83110
Q03933
Q92902
Q96S86
Q96ED9
O00479
Q96RW7
Q9P0W2
P49773
Q5VZR4
Q9UM44
Q03014
Q68CP4
Q30201
Q9BSE4
Q96DB2
P14317
Q9Y450
P01912
P57764
Q8IV61
P22352
Q9UPC5
Q9BXC1
O60234
P10071
Q8TF65
P13284
Q9H3K2
Q6P531
P19440
P52566
Q9NZC3
Q8IWJ2
P32455
Q92908
O60861
O95479
P49019
P07954
Q9P2Q2
P21462
Q9P0K8
O75044
Q01543
Q96SL8
P09769
Q9UHY8
Q7L513
Q0JRZ9
O14526
P55899
P12314
Q9Y6R7
Q9UJT9
Q9UKA2
Q9UKT7
Q9UK97
Q9NPI8
Q8IZT9
Q05397
O00519
Q8WV15
Q9Y4F9
Q8NEM7
Q6VEQ5
Q641Q2
Q9H2X8
P09467
Q6ICB0
Q7Z309
Q96PZ2
Q8TC76
Q96GS6
Q01780
O60645
O60447
P22794
P41212
Q7Z2Z2
Q16134
Q9NZ08
Q12929
O15197
P42566
O95936
Q99607
Q9H223
Q9NZN3
Q8NDI1
Q3B7T1
P30084
P32249
Q56P03
Q96CJ1
Q9H4G0
Q9NZJ5
Q9BQI3
Q9Y4J8
O60673
Q9HCU8
Q9H4A9
O77932
Q9H7D0
Q09013
Q15700
Q01459
Q16760
Q5VZ89
O75064
Q8IV53
Q9H4E7
O00148
Q9NX09
P06132
Q9UK59
Q5D0E6
P98082
Q7Z388
Q96J86
O14625
P25025
P39880
Q9NTM9
P58658
O15320
P49711
Q9NUG4
Q9NX31
Q96A57
P09603
Q9H0W8
Q96EN9
Q9BQD3
Q9BVV8
Q9NSK7
Q86T23
Q8IUI8
Q6UWF3
Q9BSJ5
Q16678
Q9BUU2
Q96NB1
Q7Z4G1
Q07092
P39059
P02452
Q96LI5
Q6ZU80
Q9UJ71
Q8IUN9
Q15642
Q9NPC3
Q86X52
Q8N1K5
Q5TGL8
P00450
Q8WZ64
Q15027
Q00532
P01732
Q01151
P40259
P30203
P09326
P08575
P16671
P20273
P11836
P78312
Q9UK58
Q14094
Q16627
Q9Y3X0
A2IDD5
Q5T9S5
Q96LX7
O60293
Q5T0U0
Q96NT0
Q9Y2M2
Q8N3R3
Q6NW34
Q9HBI5
Q5RIA9
P14384
Q9ULV8
P47755
P25774
P43234
P22223
Q08289
O60840
O00555
Q96EX1
Q8IYL3
Q5VTB9
Q7Z422
Q5SY80
Q6NZ36
Q8WWB7
Q5JTJ3
Q9P296
Q96Q07
Q9NW68
Q9NSI6
O95415
Q9BWV1
P30043
P51451
Q13075
Q9UBW5
P55061
Q00994
Q6W2J9
Q9H165
Q99933
Q9BYV9
O60512
Q8WXX7
Q9UHI8
Q9UII2
Q2TB18
Q9NR48
Q9Y575
P15289
Q96B67
O15144
Q9H9F9
P40617
Q14865
Q4LE39
Q9NWB6
Q9NP61
P35626
P35414
Q99767
Q6NY19
Q8N2N9
Q6ZTN6
Q01432
P49189
Q5TGY3
Q9BRR6
Q6IQ32
P55263
O15204
Q13444
Q96CM8
Q8WU67
Q9BZC7
Q9BTE6
Q13685
Q9UPG8
Q6IEG0
Q9H305
Q9Y3A2
Q8N5D6
Q9H7R5
O75648
Q8IYB8
Q14914
A6NM11
Q9UHN6
Q9ULC5
P43657
Q9Y2L8
Q6ZMT4
Q676U5
Q13542
Q9GIY3
Q15173
P30504
P30480
P30512
Q9H6X2
P58335
P25089
P26678
P0CL84
O95857
Q9UHQ1
O00154
Q9Y2F9
P49795
Q86T24
Q5VYS8
Q14765
Q9HA92
Q04900
Q14154
Q4FZB7
Q5TB80
Q96P16
Q13772
Q8NHL6
Q9NX76
Q8TED9
Q8IXZ2
Q9H799
Q9BVL2
Q6ZW49
P20393
Q3BBV0
Q9BTC0
P00746
Q9Y2G9
Q96N16
P40425
Q14207
Q8NHP6
Q99542
O00522
Q14161
Q86VI1
P08123
Q9BUW7
Q3L8U1
Q7Z6B0
Q8IX12
Q6RI45
Q5VTR2
Q2TAZ0
O15085
Q8N283
Q9H0M5
Q5SXM1
Q8TCF1
P15692
Q5J8M3
Q04726
Q92563
Q6ZMP0
P19484
Q9UGT4
Q6ZWJ1
P50453
Q14940
Q9NXL6
Q92835
Q5K651
Q7L099
Q96EV2
Q7Z5J4
Q9Y222
Q765P7
Q8IVH2
Q5SWA1
Q96L93
Q5JPF3
P78364
P01127
Q9NVD7
Q8NFW8
Q8TDR0
Q92918
Q8ND56
Q8N423
Q9Y2F5
Q96CN7
P25092
Q5TBA9
Q9NQT5
O60941
Q9Y4D1
Q96F07
Q9H0L4
Q86VX2
Q9Y376
Q9BXJ5
Q9NPI1
Q9UHR4
P20933
P29374
O15143
P15144
Q08AH1
Q9P2A4
Q8IZP0
O43681
Q9ULD2
O95780
Q8NEM1
Q9UID6
Q92610
Q9H707
Q5JVG2
Q14585
Q9Y3S2
Q9UDV7
Q14586
Q9UIE0
Q969J2
P17010
Q8WTX9
O15062
Q96LW1
Q9Y6I7
Q5MNZ6
Q9P202
Q15061
Q9HAD4
Q9NP79
Q96AX1
Q5THJ4
P07911
O14795
Q16851
Q9HA47
Q6IBS0
Q9C0H2
Q9Y2L5
Q15650
O43715
Q6Q0C0
O00463
Q71RG4
Q9BV81
Q8TAF8
Q9NS93
O75663
Q9BSI4
Q13009
P01266
Q9BU02
Q99426
Q66K14
Q8IZP1
Q8WUA7
Q93075
Q9UL54
Q92750
P40200
Q3YBM2
Q8N3V7
O43426
Q6UWL2
Q12768
Q9Y6Q2
P43308
Q14140
Q6IQ16
Q9HB58
Q9H2Y9
Q96BD0
P46721
Q8TEQ0
Q13596
O43290
Q9NRH2
Q9Y6H5
Q08AF3
Q92765
Q9NVU7
Q96I15
Q9Y3A5
Q9NSI8
Q9NUM3
Q96DW6
Q8TCC7
Q9UHW9
P80511
Q15413
Q8WXA3
Q9HCK4
P61587
Q495C1
O00237
Q969G6
Q68EM7
Q9BRR9
Q6PCD5
O95980
Q9NTZ6
P26374
O95715
Q9NQR4
O95947
Q9H6A9
Q4ADV7
Q9H019
Q99463
Q6N021
Q8TCZ2
Q9NQ48
Q8ND71
O75346
Q5T0J3
Q6ZUJ8
Q86TB9
O15050
Q5TCS8
A6NMS7
P22732
A6H8Y1
Q99518
Q7L5Y1
Q6ZSZ5
P35030
Q9BQ39
O95876
Q495M3
Q6ZN01
Q2M385
Q6H8Q1
O14524
O14950
Q9BX82
Q96RE9
Q9NQS3
P28827
Q9Y2R2
Q05209
Q3SYG4
Q14761
Q8IYL9
Q16378
P51888
Q13029
Q9HAB8
Q08209
Q9BZL4
Q9NUX5
Q9Y253
Q96AD5
Q13393
P16885
P15735
Q8WWQ0
P78562
Q96KR7
P98160
Q7Z412
Q5VY43
O60658
Q13946
Q53EL6
Q8NBM8
Q96RV3
Q86SE9
O43252
Q9NWQ8
O43422
Q99571
Q9H1P3
P48552
P55055
O60500
Q9ULX3
Q8NC67
Q92859
O60237
Q7Z401
Q9C0I1
Q9NXD2
P16455
P55083
Q9H8J5
Q8N5G2
P41279
Q12852
O15116
O75096
Q92539
Q8IVB5
O75022
Q9Y5X9
Q9H400
Q9UNZ5
O14901
Q9NQT8
Q9H3F6
Q5HYC2
Q7Z7F0
Q5T8A7
Q2M389
O43151
Q6IE81
Q15811
Q14571
Q14643
Q9BY32
P20702
Q00978
P05154
P48551
P32927
P27930
Q9P2H3
Q8TCB0
P46199
Q05084
Q9P2D0
Q92743
Q9P2D3
Q00613
Q8N3C0
P11169
P08263
P48506
Q96I76
Q99527
P13224
Q8NBJ4
Q03113
A6NH11
O94925
Q8WTR4
Q06828
Q5TD97
P05230
O15552
O75015
P08637
Q9UNN5
Q9UHL3
Q8IWF6
O95571
Q6UWW8
Q96J88
P0DPI2
Q6P179
O95925
Q9UBC2
Q9Y227
Q14246
Q9HBU6
Q16555
Q9Y2H0
P23743
Q9UJV9
Q9BTE1
O75935
P04080
P32302
O43822
Q8N9M1
Q8WUQ7
Q9P021
Q9BU40
Q96ND0
Q8IV36
Q86YQ8
P06681
Q9UHC6
P34972
Q9BT09
P51790
Q96K30
Q9H741
Q6P1R3
Q8N8R7
Q8IYJ2
Q99967
Q5VYM1
Q5VXU9
Q9H2X0
A4D0V7
Q8NAV2
O15519
P63027
P51861
P09564
Q07108
P28906
P29017
Q9NYV4
Q8N954
Q6ZRK6
Q2TAC2
Q8IVM0
Q6ZUS5
Q96G28
Q9NWW7
P07711
Q9Y2G2
Q5T5Y3
O75309
P55287
Q8NDD1
Q96EU7
O00478
Q7KYR7
P55201
P46736
Q13490
P48634
P54252
Q9H0Y0
Q8IUZ5
P49407
O15145
P19961
Q07075
Q9H6U8
Q9NWT8
Q13023
Q6UXC1
Q96A54
P00325
Q9UEY8
P78536
Q96QF7
Q9BUJ0
Q7L211
Q8IZY2
Q9Y4A0
Q9NRV9
Q8N3Y3
A6NHN6
Q12912
Q9BZR9
Q13133
Q5HYK7
Q96Q11
Q8NHY2
Q8N131
Q96A84
Q6IQ19
P19532
Q2TAL8
P60880
P68036
P61077
P62837
P51965
P40967
Q7Z692
P61601
O75716
Q05D32
A2A2Y4
P56555
P55039
Q9Y4M8
Q6Y2X3
O43924
P01210
Q8TCX5
Q93096
Q9NWS0
Q8WV41
Q9UM19
Q9Y3C8
P55211
O43414
Q96HQ2
P00374
Q96IZ6
P13688
Q16762
P00751
P32004
O75326
P24390
P04003
P12830
O95487
Q15436
Q13201
Q70J99
P16109
P08514
Q96LR5
P61088
Q969T4
P26022
P03951
P37288
Q86YH6
Q9UPN4
Q96RU2
Q9UIH9
Q6PJW8
Q15486
Q96A61
Q9Y2L9
Q5T3J3
A8MW92
Q7L945
Q9P2M4
O75995
Q15019
Q9GZR1
P02741
P01116
O00322
Q30134
Q9TQE0
Q5S007
Q30167
Q9NQQ7
O75298
Q99633
P49354
Q8IVI9
Q9Y2A7
P19878
Q9Y303
Q8IVT5
O75143
Q9NV31
P35680
Q9NUV9
Q9H0R5
O75923
Q495Z4
O15516
Q8TAB5
Q76L83
Q7Z591
Q86TG1
Q6IQ21
Q9NXT0
Q96SE7
Q86WZ6
Q2M3W8
Q5VZL5
Q5T200
Q52M93
O95070
Q9GZV5
Q9GZT5
Q3MJ13
Q5T6F0
Q9BRG1
O75691
Q15849
Q92575
O43396
Q9UJ04
Q9ULS5
Q9Y6G1
Q8NA92
P0C1Z6
Q96HP8
Q8IUX1
Q9BX26
Q9H5I1
Q8N3U4
Q8WVM7
P78524
Q8N0X2
Q07890
P01241
Q9H3E2
Q15477
Q9Y286
O15357
Q96BR1
Q12872
Q58EX2
Q9UPU9
Q9Y6R1
Q8WUX1
O14975
P55011
Q13621
Q8N1F8
Q5VZM2
Q96QB1
O14827
Q9UBK5
Q5JXC2
Q96DC8
O95976
Q6ZS81
Q8TDG4
Q7Z6K1
Q9Y4R7
Q6NVV7
Q6JBY9
O00186
Q2M1Z3
Q9NZ45
P17706
Q9ULL5
Q9UKN5
Q8NEB5
Q9Y6A1
Q9NRZ7
Q9ULM0
Q9BZ72
Q14442
Q96QT6
Q76G19
P42785
Q96JQ0
P0C869
Q6UX06
Q92823
Q7Z494
Q9NQX5
Q76FK4
Q9NPE2
Q13952
Q99519
Q9HCG8
Q15080
A2RRP1
O94832
P15941
Q96DM3
Q12866
Q9NXL9
Q8WXG6
Q9HBG7
P53671
Q9BT23
Q9UIQ6
Q12918
A2RU30
Q93073
Q15053
P48200
P06213
Q8NI35
Q9BTL4
P01909
Q9NZM4
Q7LDG7
P09341
Q7Z6J2
P12544
Q9P2T1
Q9BXM9
P53539
Q9NVK5
P31994
Q9UKA1
Q9Y3I1
Q96LZ7
Q86V20
Q9H098
Q92611
Q9NTX5
Q13011
Q86XF0
Q7L7V1
Q8IY21
O76096
Q99418
Q6XXX2
Q9BY42
Q70SY1
Q6FI81
Q9BQ65
Q96CD2
Q7Z3D6
Q8NDC0
O75503
Q8N1N0
O75122
Q14CX7
Q96FZ5
Q6IPW1
Q5SZL2
Q8IYT3
O95319
O75956
P22059
Q9Y239
Q8IWE5
P08581
P32246
Q7L592
Q99622
Q9NWR8
Q9NZS9
Q9UNA0
Q9UBL3
Q96DX5
Q8N6S5
Q92482
Q8N187
Q7Z6V5
Q02548
Q9H6E5
O60667
O00481
Q9BZJ4
Q13106
Q9UI33
Q9NZE8
O95859
Q9NQ94
Q14590
Q96GE9
Q8NHJ6
Q86VB7
Q9NZ32
P15516
Q9BST9
