# Supplementary material
Source: MDPI journal article supplement (https://www.mdpi.com/2227-9717/10/2/291)
Supplement: s1 [file s1 › SupplementaryTable2.xlsx]

## Sheet: Sheet1
Viral targeted reviewed human proteins human proteins
UniprotID
O60885
Q01094
P28749
P07305
Q5T4S7
Q14978
O00716
Q14188
P20248
O96020
P06493
P19784
P52294
P19525
Q9UGR2
P01106
Q96SB4
Q07812
P08631
O15350
O60563
Q16637
O75348
Q13309
Q969H0
P51784
P09619
Q12933
Q9Y6K9
Q92830
Q9Y4A5
Q92831
P29597
P62826
P18887
P38936
P49715
P17676
P49736
P11142
Q99848
Q12857
O43291
Q16611
P18846
P62333
Q13416
Q15554
Q01105
Q08050
P10644
Q04637
P61978
O14920
Q15628
Q86Y07
Q93009
P78337
P12814
Q9UMX0
P33992
P33991
P25205
P33993
P17535
Q9UI14
Q9BYX4
Q07021
P68400
P29590
O15524
Q9HC16
P61758
Q12983
Q13363
P21980
Q9BUN8
Q8IX03
P54098
Q8IXM3
Q13642
Q96JB3
Q05086
Q9UHI6
Q8TD31
P04406
P15814
P39023
Q9HA82
P80303
O75094
Q02818
Q9UHV2
P62136
Q9UBX5
P62995
P23497
Q66K89
Q16531
Q96JM7
P06454
O43889
Q9H2H8
P31274
P22736
Q13077
Q14653
Q14257
P52292
Q13573
Q9Y297
Q5JY77
Q16206
Q96D09
P01135
O00499
P52799
Q96PU5
P43405
O00308
Q15223
P01579
P20226
P19793
P05455
P17301
P13500
P13051
Q9BRK4
P07942
P18545
A1KXE4
Q9NRD5
Q9HCE6
P61289
Q16891
Q9H8L6
Q99750
Q8WV28
P63167
O76013
P28676
P36578
O43707
P62851
P10914
Q9HBE1
Q8TAE8
O00754
P02652
Q13323
Q15645
Q96EY1
P38398
P78527
P24864
P27708
P46934
P35968
P78310
P18847
P45984
P12931
P07947
Q14155
Q15052
Q8TEJ3
O95639
Q96G25
Q9NVC6
Q9NX70
P49336
O75586
Q9NWA0
P04198
P08709
P62937
P01737
P11233
Q00534
P51531
P21796
O95477
P21673
P51571
Q6UXK2
O95466
Q96SI9
Q92993
P53999
Q8WXE0
Q9UEW3
P55268
Q9UBP4
Q96NA8
Q71U36
Q96CV9
Q8TF72
O95219
Q5SRE7
P09455
P11161
Q06889
Q99683
O60486
P22681
Q9C035
P10144
P20718
P15151
O75896
Q86U06
P42574
P55210
Q02539
Q16777
P22492
P62805
O00505
P62829
Q99729
Q6T4R5
Q96KK5
Q93077
P04908
P11021
Q99878
P12277
P12036
Q7L7L0
P20671
Q9BQE3
Q9BTM1
P0C0S8
Q15172
Q13362
Q14738
Q16537
Q13330
Q5VTE0
Q9UPU5
O60341
Q16576
P49411
P56545
O14654
Q05639
Q09028
O94776
P68371
P62269
Q96EY5
Q9UK41
Q9H9H4
Q9H7P6
Q8NC56
Q96HS1
Q6PEY2
P31151
Q3ZAQ7
P0DPH7
Q15904
Q9NZT1
P34931
Q9UGM3
P0CF74
P0CG04
O60814
P12838
Q93079
P59665
P01859
Q99880
P62807
P08311
Q99879
P08246
P58876
P05164
P24158
Q99877
P01876
Q5QNW6
P12273
Q4G0F5
Q96PK6
P05141
P12236
P13637
P42336
P42338
Q92569
P05023
Q99733
P23396
Q6NSJ2
P40227
P50991
Q9BUJ2
Q96FJ2
P05388
P30050
P05386
P24666
O14734
P62249
P19474
O14782
Q9P2P1
P54652
Q9HCC0
O15037
P35268
Q13085
Q13619
Q9BW61
P63151
P22532
P35326
Q86YZ3
Q13885
P38159
Q3ZCM7
P13929
P35325
Q9BVA1
Q08211
Q14103
Q9BYE4
P09104
Q12905
P22531
Q71UM5
P63267
P42677
P18621
O95071
B2RTY4
Q9NVI7
P78537
Q9UIG0
Q9H0C2
Q7L2E3
Q9NPA8
P25398
P22528
P35321
Q9HCE1
P62854
P39019
P46781
Q07020
P46779
P68431
P62266
Q08170
P15880
P62888
Q8N257
P18077
P62906
Q6NVV1
P40429
P05166
Q16778
Q96RQ3
P62244
P61513
Q16695
Q9Y3U8
Q9UNX3
P83731
P84098
P25705
P83881
P60866
A5A3E0
P62861
P06899
Q71DI3
P50914
P32969
Q99623
P62280
P46783
P46778
Q02878
P62847
P62424
Q6S8J3
P08865
P62241
P62899
P62750
P61254
P61247
P61353
P18124
P62917
P62081
P49207
Q969Q0
P62753
P62701
Q9NR30
P62910
P62277
P46777
P33778
P42766
P62913
P61313
P23527
P46776
Q02543
Q9NZI8
P57053
P46782
Q96A08
Q96B45
Q969J3
Q9BYP7
Q08AE8
O15020
P80723
P60174
P29966
O94966
Q9H8S9
P14174
Q562R1
O14746
O43187
P06756
Q92985
P51681
P35520
Q8WYJ6
Q06547
O14639
P43360
P43364
P50222
Q13126
O75489
Q99942
Q8IUQ4
Q13190
Q15633
Q99081
Q12800
P10746
P24278
Q13155
Q9H2G9
O14503
Q9Y5V3
P51116
Q6IB77
O75608
O75525
Q96B26
Q9UL40
Q9H3Q1
O60684
Q9Y6X0
Q9H190
Q9UJ41
Q6IBW4
Q9NZF1
Q9UJC3
Q9H892
Q8N9N5
Q9UHQ4
Q96AT1
Q9HA38
Q96IK5
Q96T21
Q96FZ7
Q9H898
Q8N5R6
Q8NHQ1
Q9BXR0
Q6P1W5
Q96MC5
Q96DZ9
Q8TD10
Q96D05
Q8N448
Q8N661
P0C7W6
Q08379
P43365
Q6NT76
Q9Y2D8
P25490
Q00577
P01375
Q14116
O15259
O95153
P42680
P20916
P78396
Q99966
P31323
P25391
Q8WXE1
P15927
Q9H7B4
Q15057
O43791
A8CG34
Q8IXQ5
Q9NQ55
Q9UFW8
Q9NQX4
P51532
Q9Y3I0
O00425
Q13151
Q9Y2I1
P84090
Q13310
Q9UKM9
Q9Y265
Q9Y230
Q9HAV0
P62879
P16520
Q3ZCQ8
Q8NHW5
P68366
O00159
Q9GZV4
Q8N0Y7
P48643
P40926
P22234
Q6IS14
O75369
P06576
P15259
Q15369
P09914
P55957
Q9ULD8
Q9UPY3
Q9Y572
P37231
O14874
O43559
P30281
P09884
P98179
A2RUB6
O00468
O14594
O14777
O15084
O15432
O60504
O60687
O75093
O75095
O75398
O75962
O14733
O43521
O95602
P12004
P12268
P20585
P43246
P49959
P50402
P54132
Q12873
Q13426
Q14683
Q15393
Q96GM5
Q9UKL0
Q9UMS4
P26045
O15027
O15460
O43592
O60812
O75190
O75953
O76021
P07814
P08708
P09012
P16402
P25685
P26373
P27635
P28072
P30837
P40938
P41252
P45378
P62316
P68363
Q04837
Q14315
Q15293
Q8N1F7
Q9BPW8
Q9BQA1
Q8WUI4
Q9UQL6
Q13283
Q13794
Q9BXH1
Q9Y463
P11532
Q96L92
O75925
O75928
Q13415
Q99741
P15498
Q9UQF2
P78406
O15444
P02776
Q9NRJ3
Q9Y258
O75475
Q14676
Q12888
P20701
P28065
Q8WUF5
Q9HAU4
Q9ULW6
O96013
P00414
P02794
P07196
P07197
P10515
P13378
P14136
P17661
P20265
P24557
P27918
P35609
P55347
P56945
P57075
Q03188
Q14112
Q14CM0
Q15126
Q16548
Q2M1P5
Q3T8J9
Q494V2
Q58EX7
Q5QGS0
Q5T3F8
Q5VWN6
Q6PIW4
Q75N90
Q76N32
Q7L4P6
Q7Z4I7
Q7Z7N9
Q86UC2
Q86UE6
Q86VK4
Q86VW0
Q8IZ52
Q8N1W1
Q8N2Y8
Q8N3Z6
Q8N7W2
Q8N960
Q8NBZ0
Q8NFF5
Q8TBC4
Q8TE76
Q8TEP8
Q8TES7
Q92782
Q92832
Q92932
Q96EK7
Q96GW7
Q96H12
Q96N67
Q96NW7
Q99447
Q9BQ16
Q9BQ52
Q9BR76
Q9BTY2
Q9H0F6
Q9H9L4
Q9HBI0
Q9HCB6
Q9HCM3
Q9HCS7
Q9HCU4
Q9NP80
Q9NRR5
Q9NUL5
Q9NVV9
Q9NXP7
Q9P0V9
Q9P2D6
Q9P2E9
Q9UBD0
Q9ULU8
Q9UMS6
Q9UPU7
Q9Y2B5
P36941
O75446
Q96ST3
Q15464
Q9UPY8
P04553
P22674
Q15046
O95786
Q7Z434
Q86XR7
P58753
Q14164
Q9Y6N6
P30038
P35548
P11166
P49590
Q13546
P20963
O95239
O15205
O60841
Q14807
Q14689
O43504
P52594
P61221
O75531
O60551
P30419
P05362
Q13177
P17252
P27361
P98155
P79483
P13762
P01562
O14744
O95801
Q15631
Q9UJM8
Q9H6F5
Q96P48
Q9NX38
P08493
Q9Y3D8
Q9UKC9
P10747
O00750
O75747
Q8NEB9
O00329
P09758
P29762
Q12756
P55854
P21912
Q13049
P05231
P04004
Q00653
O15244
O15245
Q01201
P04156
Q12962
Q16514
Q15543
Q6P1X5
O00268
Q7Z7C8
P52657
P52655
P18074
P51948
Q06609
P35251
P35250
P35249
P40937
P61218
P53803
P62875
P30876
O15514
P62487
P36954
P29083
P35269
P32780
Q13889
Q92759
O43543
P31431
Q15560
P84022
Q13886
P10827
P05198
P22301
Q15139
Q05655
Q02156
P05129
Q04759
Q9BUP3
P63272
O60266
O43306
O60503
O95622
P40145
P51828
Q08462
P09958
Q16549
Q92824
P05112
P29965
Q9BUF5
Q9UHK0
Q96QV6
Q8IUE6
Q71UI9
Q9P0M6
P16104
Q99525
O15527
P0C0S5
P0C5Z0
P09471
Q01959
O75056
P12821
P17693
Q9UGM5
P09038
Q07864
Q15542
O00462
O60476
P04141
P08700
P33908
Q10469
Q13724
Q3V5L5
Q5SRI9
Q8TET4
Q9NR34
Q9NTJ4
Q9UBM8
Q9UKM7
Q9UM21
Q9Y2E5
P47992
P29459
Q9C0K0
P01906
P01911
P06340
P13765
P16410
Q05513
P04062
P41743
P23443
P32241
P10147
O14893
O95782
P35221
P53680
P56377
P61966
Q96CW1
Q9BXS5
P13612
P26842
P28907
Q16827
P04216
P15813
P11226
Q9Y4B6
P35558
P03973
Q68CQ7
Q7Z4J2
Q8IYK4
Q8NBJ5
Q96MS3
P13667
P48061
P02747
P68032
P68133
P51679
P35228
Q05586
Q13224
Q14957
Q8TCU5
Q9HD40
Q9Y6Y0
Q9Y6V7
Q9NTK5
Q15165
Q14697
Q9BRK5
Q99470
O00231
Q9HCN8
Q9Y4L1
Q14574
P13073
Q07065
O75955
Q96DZ1
P10321
O94919
Q8N4V1
P20674
P35232
Q9NRD1
Q9Y277
Q12907
Q9NYU2
O96008
O96000
Q8NBS9
P14854
Q7Z4H3
Q14566
O75155
P12532
O00469
P22314
Q02809
Q9P2R7
Q2T9J0
Q9Y263
Q8NEW0
O60518
Q9GZS3
Q9H3U1
Q96I59
Q12904
P26639
P54136
O43324
P13489
Q9Y3F4
Q9Y3B7
Q8N1G4
Q9UGY1
Q9UI30
P13995
Q9NZJ7
P42771
Q9UBQ5
O00303
Q9Y262
Q13347
O15372
Q9UMS0
P62714
Q9Y6Q5
Q92499
O95067
P14635
P30307
Q8WWL7
Q13751
P17096
Q9NS91
Q9UKB1
O75914
Q00536
P55895
Q15283
Q9UBG0
P06753
P07951
P12883
P13533
P35749
Q9BXW4
Q9H492
Q9UKX3
P23381
O95251
Q92794
Q9H7Z6
Q9ULZ1
Q9H1C3
Q86SX6
Q9NS18
P04437
P09493
P60228
Q92805
Q9BU89
O14976
Q07820
Q9H1A4
O60232
Q8TCU4
Q12948
P23526
Q9BZF3
Q9NR33
P49591
Q9NRF9
O95714
Q86XZ4
Q9HD23
Q7Z7H5
Q9Y6G3
Q5T3I0
Q96BP2
Q2TAY7
P49755
P29372
Q9BVK6
Q8NAF0
P35556
Q9UK99
Q03111
Q96JP5
Q96HN2
Q9C0C9
Q96EB6
Q9UHB7
Q8NCA5
Q7Z6Z7
Q99615
Q8IWV8
Q13951
Q9UBF6
P11441
Q9NRK6
Q9Y6C9
Q2PZI1
Q8IWZ3
P28288
P21964
Q9H4A6
O00217
Q13409
Q9Y6G9
P17152
Q5T8D3
Q96A33
Q5SW79
Q9NX00
Q86T03
O14828
Q5T9A4
Q9UBB4
P18859
P20020
O95470
Q53GQ0
Q96P70
Q9HCU5
Q9UHQ9
Q8IY95
Q6P1M0
O95573
Q969Z0
P78357
Q8NCG7
Q5BKY9
Q13217
P48723
Q96EE3
Q8NFQ8
O14967
Q9BZQ6
Q8NBJ7
P48741
Q3MHD2
Q13112
Q9UI08
O14656
Q9BTV4
Q9BUT9
O43852
P01130
Q14696
Q6DD88
Q96IV0
P43630
Q9NWW5
P16615
O00264
Q15392
P07384
Q9Y282
Q8TCT9
P61009
Q96AJ9
Q9Y5J9
P48426
O60220
Q9Y5L4
O15260
Q8N766
Q9P035
Q9NXG2
Q9UI47
P55769
Q9C0E2
Q9NVV0
Q969X5
Q9BRX2
Q9Y266
Q9UJX6
P22830
Q9BTY7
Q12874
Q8NFG4
Q86X55
Q8TF40
Q86US8
Q99704
O60610
O75037
Q8WV92
P82933
Q9Y2Q9
O14745
O75607
Q7L2J0
P51816
P25686
Q16659
Q9UNS2
Q9BT78
P57678
Q8WXD5
O75386
P61201
Q92905
Q99627
Q96F15
P42695
P24539
P30049
Q63HN8
Q15185
O75947
Q8TC07
P48047
Q93084
Q96RQ1
P43629
Q9BUV8
Q99442
Q15005
Q15427
P62877
Q86VP6
Q6ZU67
Q14999
Q13618
Q709F0
O95757
Q13509
Q01968
Q53EZ4
Q99536
P14649
O00746
Q2VIR3
Q7L273
P49770
Q9Y6D9
Q9NR50
P06730
Q92615
Q9H2U1
Q71RC2
Q9NUD5
Q16629
Q9BQP7
Q96BR5
Q9Y2S6
Q8IZP2
P00403
Q15008
O14787
Q16718
Q9NVH1
P57105
Q6UW68
O43759
O75844
Q96GD4
O95831
Q8WWC4
Q9NTJ5
Q15836
P62072
Q6IAN0
Q8WW22
Q9BXW9
A6NKD9
Q96CT7
O14925
P62263
Q9UBX3
A0FGR8
P36542
P05387
O75964
P56134
Q9NS69
Q7L0J3
Q15758
Q9NZ01
Q9UJS0
O60884
Q9UHG3
Q9UNL2
P51970
O00762
Q92621
P69849
Q63HR2
Q9UL25
P09669
Q9NWU2
O43826
Q9BW92
P48444
Q9NVI1
O00483
O43175
P04844
Q9Y2S7
O95202
P20340
P47914
O14735
O43169
Q13263
O94905
P20645
P54709
P30154
Q9BU61
Q13257
Q5VWZ2
Q9Y3E5
Q9NZL4
P51617
Q96A26
Q9P032
O75251
Q9H1K4
Q13015
P07099
Q9BRQ6
Q8N2K0
P31930
P61106
Q4V339
P62857
P22695
P02786
Q9BT22
Q9Y5L0
Q9Y5M8
Q8IYM0
P23786
Q12797
P43307
Q96AA3
Q9H9B4
P00387
Q8N6L1
Q9P0J0
Q9Y5Q8
O15173
Q96BM9
Q53HC9
Q9BZW7
P28340
Q01813
Q9UID3
Q9UI10
Q92552
Q13144
P0CG38
P0CG39
O75808
P52815
O15226
Q76NI1
P31749
O75907
Q9BYF1
Q8NBT2
P57682
Q6DCA0
Q9Y6V0
Q96PT4
Q96B01
Q16600
O14965
O00559
P54274
Q96PI1
P61964
Q16644
Q7Z6M1
Q8IW41
Q99986
Q9H8X2
Q8N5I9
Q8N6L7
Q9P270
Q8NEG0
Q9BU76
Q8NEG7
Q8IXS8
Q9BWK5
Q96E40
O14598
Q9H7E9
Q9Y3C1
Q8IWP9
P60006
O95424
Q8N3C7
Q12894
Q9H4G4
Q8IV56
Q96EH5
Q9NU19
Q16763
Q6B0I6
P06746
Q96DX7
P60002
Q9Y5P8
Q5MJ08
Q8N6M0
Q68E01
O75937
Q8N490
P31689
Q16740
O14545
Q9BQT8
Q9BSK2
Q92504
Q9HC21
Q16186
Q53H12
Q92947
P33947
Q86YP4
O95983
O95373
Q9H936
Q8N653
Q8WVX9
P13645
P42167
Q00587
Q9NPF4
Q6NTF9
Q9UBF2
Q9Y241
Q9Y3B4
Q5XKP0
Q01650
Q969F1
Q9NPL8
Q14657
P48729
P63220
P63173
Q8WXF1
P32119
Q9P1Q0
Q6Q759
P49327
Q9NQI0
P02042
Q6ZN28
Q9P0W8
Q56VL3
Q6PI48
Q96M02
Q7L1T6
Q8IW75
O75116
Q52LJ0
Q9NPP4
Q9BX69
Q9NYQ3
Q86Y82
O96017
P02675
P53350
Q9Y6A9
Q99836
Q9UHD4
Q15485
P02753
P81172
Q9NPA0
P22309
Q9Y320
P03905
P35354
P27701
Q9NY26
Q6UX53
Q15125
P02750
Q6N075
Q00765
P25311
P22310
Q06055
P04114
P54851
Q9P0B6
P00167
Q15166
O75306
P47813
Q08830
O95789
P41225
P27540
P61328
O14576
Q9HCS5
P51959
Q08426
Q8NHQ9
Q13242
O14602
Q6ZT98
Q9Y237
Q53F19
Q9H6S0
P61020
Q14141
Q96BZ9
Q969R2
Q5VT25
P78344
Q13129
P02749
Q13099
P98175
Q9UQ90
Q13813
Q03001
Q9BXC0
Q9ULJ7
P05546
P02787
P67936
O14628
Q14966
P04035
Q9Y5W7
Q13464
Q96KQ7
Q5JTC6
Q13670
Q8N302
O95613
O43716
Q4ZG55
Q9BVG3
Q6Q788
O14972
P02671
P0C7X2
P01042
Q9NX95
P02774
Q9H6D7
Q14980
A6NCC3
Q92667
Q8WTV0
Q9H2X3
Q9NNX6
O60488
O60934
P51636
Q15573
Q53T94
Q9H496
Q8IVP5
O95232
Q0VF96
Q92564
A6NI86
P68543
P05787
Q05519
Q9UKX7
Q8WXH0
Q14789
A8MPP1
Q9BZF9
Q14203
P51648
P29353
O14519
O14896
O43502
O43566
Q96F86
Q8IY92
P07992
Q92889
Q5VYV7
Q9H0U9
Q9UII4
O43463
O95365
P20618
P28074
P40306
P49721
Q53H47
O43423
O94906
O95208
P09234
P17858
P27695
P35544
P42285
P46060
P49916
P52789
P62304
P62308
O43505
P38646
P41732
P78369
Q8N0U8
Q969W9
Q9NQ11
Q9NX40
Q9Y279
Q9BX66
O00541
O43913
O95347
P11388
P17480
P46087
P51398
P78346
Q01196
Q06945
Q08945
Q12788
Q14527
Q14739
Q15003
Q15059
Q15397
Q29RF7
Q5JTV8
Q5QJE6
Q5SSJ5
Q8TDN6
Q8WWP7
Q96FV9
Q96GN5
Q99567
Q9BVP2
Q9BW27
Q9BWT1
Q9BZE4
Q9H4L4
Q9NVP1
Q9P2K5
Q9UJX3
Q9UKN8
Q9UKV3
Q9UNQ2
Q9Y252
Q9Y2X3
Q9Y6E2
Q96RJ0
Q14690
Q15424
Q15428
Q53GS9
Q66LE6
Q7Z2T5
Q86U38
Q86W42
Q8N5C6
Q8N684
Q8NE71
Q8NI36
Q8WWY3
Q92979
Q96EP5
Q96GM8
Q96QR8
Q96T37
Q9BTD8
Q9BVC5
Q9HAN9
Q9NQT4
Q9NY65
Q9UNX4
Q9Y5B6
Q9NVP2
O43513
Q99856
Q8N6T7
O43837
O95817
P13674
P15531
P30047
P51649
P62841
Q13557
Q96C36
Q9NWM8
P35568
O00458
P23025
Q15257
Q9BY43
P00739
Q13769
Q9Y3Z3
O95218
P15170
P41134
Q03060
Q6IPX3
Q7RTU3
Q7Z7J5
Q86WR0
Q8IV48
Q8NAP3
Q8NC24
Q92754
Q96NC0
Q9BRK0
Q9BWU0
Q9BZE9
Q9H4D5
Q9NVW2
Q9UHF5
Q9UNP9
Q9Y4C8
Q5VW32
Q9NR22
Q9NVM4
P29120
Q96LA8
Q969M7
P55345
Q9H668
Q95460
Q8IXJ6
Q6VMQ6
P15882
P30086
Q13491
P51674
Q9NXG6
Q96T68
Q9BRQ0
O43172
Q09161
P16152
P55916
Q8N5U6
P27449
Q96AY3
Q9H7D7
Q9UN37
Q13087
Q8IUX4
P46100
Q04725
Q9NPF5
Q92608
Q9Y2T1
Q9NPY3
P29375
Q8NFH5
P21860
Q9NY74
Q5SYE7
Q92558
Q8IZ21
Q96EA4
Q9NXG0
Q9BXL7
Q8N8U9
Q9P0J7
O94953
Q13127
Q9NVR5
P00740
P24043
P41235
Q5VSY0
Q8TCN5
Q92748
O00339
P02795
Q9NYW8
Q5M9N0
O14640
Q9P2M7
P52756
Q9BVJ6
Q6ZU65
P12259
Q5JSZ5
Q86W92
Q6UXV4
Q9ULT8
Q9NZ09
Q9UL03
Q659C4
Q86T75
P13797
Q8TDD1
Q9Y337
E9PAV3
P15622
Q5JR59
Q96QF0
Q9Y6H6
Q8IVS8
Q9Y5F6
P49643
P31260
Q15022
Q9NQL9
P48029
Q7L190
Q9H1K1
P17655
Q92187
Q658P3
Q14202
O60760
Q92530
Q9BUZ4
P11684
Q8IWX8
Q9NRY2
P82914
P06703
P29317
P19367
O75688
P16401
P10412
P46821
Q9Y399
P11387
Q9UH92
Q6PF05
P43268
Q5T8I9
O15287
Q9H4K1
Q9NP87
P19013
Q8IZQ1
P19012
P82932
Q969H6
Q33E94
Q9GZT8
Q8N883
Q9BY27
Q6ZVK8
P78560
Q969F0
P23508
Q9BSL1
Q86VE9
Q9NPG4
Q8NA29
O75387
O43159
Q9GZU2
P29144
Q9Y4B4
Q69YQ0
Q15287
P32243
P31249
O43186
Q8WW34
Q8N4L8
P02538
P17482
Q6PF18
Q6PEX3
Q9P0T4
Q9NSA3
Q5W5X9
Q9HAQ2
Q9BV90
Q96BZ8
Q9C086
Q8IUF8
Q7L2R6
P11413
Q14517
Q8TED1
Q9BWM7
P08172
Q8NBU5
Q9NZC7
Q9NRP0
P98194
O60565
Q8IY17
Q8IWT6
Q14186
Q10472
Q96AM1
P53801
P28300
Q53TN4
Q06033
Q9NRX4
P78385
P54646
O14578
A8MPS7
Q9H082
O43805
Q96S52
P13807
O95425
Q5T7W7
P46527
P19419
Q8NDB6
Q8WVN8
Q86W33
Q1MSJ5
Q99538
Q96AH0
O15217
Q96HB5
Q01970
P47869
O15078
P54920
P50479
Q9H0E3
Q76M96
P60903
P40123
Q8WWH5
Q6UWP8
P43003
Q8TDL5
P38432
Q9BUL8
O15021
Q6ZMV9
Q12834
Q9NRW1
Q15398
Q7Z6G3
Q9UBB5
Q9Y2M0
Q8NBQ5
Q14331
Q9NVV4
P61163
P49588
Q96AG4
P13647
Q8TD20
P31941
Q2NL82
Q9UNK9
Q13884
Q8WZ42
P18085
O60942
P83111
Q9Y696
O75934
Q13895
P26368
Q9NRX1
P49137
Q8WU90
P09543
Q13443
Q9NZM1
O14683
Q01628
Q3KQU3
Q9HBR0
Q9H2V7
O15400
Q6UVK1
Q86UL3
Q9Y3M8
Q9HA65
Q5TGY1
Q16527
P33527
Q9Y4P3
Q969N2
P27105
Q9HC07
Q9Y673
Q99500
Q9H0E2
Q96K19
P48556
Q63ZY3
O15321
Q9BRK3
Q9BZ29
Q9Y6N5
P62070
Q9GZP9
Q70UQ0
Q15858
Q96N66
P55145
Q8TEQ8
Q00059
P19622
P49760
P0DJI8
P13056
Q9Y4Z0
P00505
Q58DX5
Q9NQ79
Q9HDC9
P03897
Q15561
P41219
Q9NXX6
Q9Y2V7
P12272
Q9BWF2
Q8TAP6
O95235
Q9P2H0
Q9BVC4
[truncated: 1,918 more rows]
