# Supplementary material
Source: MDPI journal article supplement (https://www.mdpi.com/2227-9717/10/2/291)
Supplement: s1 [file s1 › SupplementaryTable3.xlsx]

## Sheet: Sheet1
Top GO IDs for bacterial and viral targeted human proteins
GO IDs
GO:0005829
GO:0005634
GO:0005737
GO:0005886
GO:0005654
GO:0046872
GO:0016021
GO:0070062
GO:0016020
GO:0005576
GO:0005887
GO:0003677
GO:0005524
GO:0005615
GO:0042802
GO:0003723
GO:0045944
GO:0000981
GO:0005739
GO:0007165
GO:0005794
GO:0042803
GO:0005783
GO:0008270
GO:0048471
GO:0000790
GO:0043312
GO:0000122
GO:0005730
GO:0003700
GO:0043231
GO:0005789
GO:0045893
GO:0006915
GO:0006355
GO:0000978
GO:0009986
GO:0005509
GO:0006955
GO:0030054
GO:0001228
GO:0045892
GO:0007186
GO:0000139
GO:0007155
GO:0009897
GO:0015031
GO:0032991
GO:0016567
GO:0045087
GO:0019901
GO:0016607
GO:0008285
GO:0005856
GO:0043066
GO:0005764
GO:0006357
GO:0005096
GO:0030154
GO:0035556
GO:0008284
GO:0005925
GO:0005813
GO:0031410
GO:0000977
GO:0016324
GO:0007275
GO:0046982
GO:0005765
GO:0003682
GO:0043065
GO:0043565
GO:0005769
GO:0010628
GO:0003779
GO:0006468
GO:0005768
GO:0006954
GO:0019221
GO:0002250
GO:0003713
GO:0016604
GO:0050776
GO:0005525
GO:0030425
GO:0030027
GO:0001525
GO:0006886
GO:0045296
GO:0030335
GO:0062023
GO:0008134
GO:0030424
GO:0005788
GO:0005759
GO:0038023
GO:0098978
GO:0031625
GO:0044877
GO:0005815
GO:0005743
GO:0016032
GO:0003735
GO:0006412
GO:0051301
GO:0019899
GO:0005874
GO:0043687
GO:0004674
GO:0006413
GO:0019083
GO:0000184
GO:0003924
GO:0000398
GO:0007283
GO:0043025
GO:0006614
GO:0007049
GO:0006511
GO:0006366
GO:0006281
GO:0070126
GO:0070125
GO:0016887
GO:0031965
GO:1990904
GO:0008022
GO:0008017
GO:0019904
GO:0043005
GO:0006974
GO:0003714
GO:0045202
GO:0016579
GO:0006364
GO:0045121
GO:0000287
GO:0005635
GO:0006888
GO:0006367
GO:0043161
GO:0000209
GO:0014069
GO:0005102
GO:0005741
GO:0010008
GO:0004672
GO:0004842
GO:0000165
GO:0050821
GO:0003729
GO:0006260
GO:0007568
GO:0010629
GO:0043123
GO:0022625
GO:0030496
GO:0007399
GO:0006457
GO:0030198
GO:1901796
GO:0000278
GO:0044212
GO:0000086
GO:0006508
GO:0015629
GO:0050852
GO:0051607
GO:0061630
GO:0046777
GO:0008283
GO:0044267
GO:0000784
GO:0051092
GO:0001701
GO:0070268
GO:0018105
GO:0005516
GO:0001227
GO:0051260
GO:0007420
GO:0000082
GO:0070374
GO:0016477
GO:0042493
GO:0051082
GO:0015630
GO:0090090
GO:0006283
GO:0006325
GO:0042981
GO:0016323
GO:0005814
GO:0071222
GO:0051015
GO:0008380
GO:0007507
GO:0005667
GO:0055085
GO:0007411
GO:0005198
GO:0006334
GO:0005762
GO:0051087
GO:0005802
GO:0005200
GO:0003697
GO:0000786
GO:0000226
GO:0006406
GO:0030246
GO:0042393
GO:0032496
GO:0007596
GO:0031982
GO:0006890
GO:0016055
GO:0030018
GO:0007050
GO:0007030
GO:0045471
GO:0090263
GO:0001666
GO:0032981
GO:0065003
GO:0031424
GO:0006397
GO:0030426
GO:0001650
GO:0043547
GO:0002181
GO:1900034
GO:0005819
GO:0000922
GO:0005911
GO:0009615
GO:0042127
GO:0007267
GO:0034220
GO:0038095
GO:0043488
GO:0022627
GO:0030659
GO:0030176
GO:0006936
GO:1904813
GO:0072562
GO:0003690
GO:0010468
GO:0001934
GO:0060271
GO:0030036
GO:0007005
GO:0071356
GO:0005178
GO:1901990
GO:0016363
GO:0008544
GO:0005770
GO:0031145
GO:0006979
GO:0042742
GO:0004252
GO:0001649
GO:0050900
GO:0008289
GO:0072659
GO:0007010
GO:0008201
GO:0044325
GO:0005840
GO:0016236
GO:0055114
GO:0046983
GO:0047485
GO:0005929
GO:0016301
GO:0016192
GO:0043197
GO:0000785
GO:0042795
GO:0006351
