# Supplementary material
Source: MDPI journal article supplement (https://www.mdpi.com/2227-9717/10/2/291)
Supplement: s1 [file s1 › SupplementaryTable4.xlsx]

## Sheet: Sheet1
Features wise performance measure
Sequence Features
Features set	Vector Length	Method	Sensitivity (%)	Specificity (%)	Accuracy (%)	PPV (%)	MCC	F1 score (%)	AUC
Amino acid composition (AAC)	20	SVM	72	42.6	69.2	91.6	0.098	80.6	0.58
Amino acid composition (AAC)	20	RF	71.4	42.2	70.2	97.1	0.053	82.3	0.629
Amino acid composition (AAC)	20	DNN	74.3	54.2	71.9	92.3	0.208	82.3	0.699
Dipeptide composition (DC)	400	SVM	71.8	46.3	70.1	95.4	0.086	81.9	0.598
Dipeptide composition (DC)	400	RF	71.1	50.8	70.7	98.4	0.062	82.5	0.614
Dipeptide composition (DC)	400	DNN	90.7	76.1	86.4	89.9	0.671	90.3	0.931
Pseudo amino acid composition (PAAC)	25	SVM	72.8	36.8	65.4	81.3	0.089	76.8	0.582
Pseudo amino acid composition (PAAC)	25	RF	71.6	47.7	70.7	96.9	0.086	82.3	0.628
Pseudo amino acid composition (PAAC)	25	DNN	74.3	50.3	71	89.9	0.189	81.3	0.708
Composition, Transition and Distribution (CTD)	147	SVM	71	54.1	71	1	0.011	83	0.525
Composition, Transition and Distribution (CTD)	147	RF	71.4	53.7	70.9	0.978	0.091	82.5	0.622
Composition, Transition and Distribution (CTD)	147	DNN	71.1	52.2	70.7	0.991	0.023	82.8	0.603
AAC_DC	420	SVM	71.1	50	70.6	99	0.05	82.8	0.602
AAC_DC	420	RF	71.2	49	70.5	98.1	0.055	82.5	0.62
AAC_DC	420	DNN	89.8	76.1	86	90.3	0.658	90	0.924
AAC_DC_PAAC	445	SVM	71	53.7	70.7	99.6	0.038	82.9	0.594
AAC_DC_PAAC	445	RF	71.2	49	70.7	98.2	0.062	82.5	0.621
AAC_DC_PAAC	445	DNN	94.1	86.9	92.4	95.7	0.807	94.9	0.939
AAC_DC_PAAC_CTD	592	SVM	71	76.4	71	99.9	0.069	83	0.566
AAC_DC_PAAC_CTD	592	RF	71	40.9	70.4	97.9	0.041	823	0.627
AAC_DC_PAAC_CTD	592	DNN	71	39.3	70.1	96.2	0.032	83	0.588
Gene Ontology Features
Gene Ontology (GO)	282	SVM	56.8	35.8	52.6	70	0.031	61.4	0.283
Gene Ontology (GO)	282	RF	73.6	41.4	66.7	82.8	0.125	77.9	0.613
Gene Ontology (GO)	282	DNN	85.3	67.2	80.2	87.5	0.513	86.4	0.886
Network Features
Network	9	SVM	73	32.9	54.2	0.555	0.06	62.7	0.538
Network	9	RF	72.9	32.5	53.9	0.553	0.06	62.6	0.527
Network	9	DNN	71	31.7	53.3	0.545	0.05	61.9	0.512
Mixed features
AAC_DC_PAAC_GO	727	SVM	71	41.7	70.9	99.9	0.023	83	0.609
AAC_DC_PAAC_GO	727	RF	71.1	44.5	70.5	97.6	0.052	82.3	0.635
AAC_DC_PAAC_GO	727	DNN	88.8	71.1	83.4	87.9	0.603	88.3	0.914
AAC_DC_PAAC_CTD_GO	874	SVM	71	70	71	99.9	0.06	83	0.567
AAC_DC_PAAC_CTD_GO	874	RF	71	48.1	70.4	98	0.057	82.3	0.635
AAC_DC_PAAC_CTD_GO	874	DNN	71	40.3	70.12	96.4	0.035	83	0.563
AAC_DC_PAAC_CTD_GO_Network	883	SVM	71	48.1	70.3	96.2	0.06	81.5	0.595
AAC_DC_PAAC_CTD_GO_Network	883	RF	71.4	49.7	70.5	97.9	0.07	82.6	0.642
AAC_DC_PAAC_CTD_GO_Network	883	DNN	72.9	62.8	72.1	96.8	0.178	83.1	0.725
