# Supplementary material
Source: MDPI journal article supplement (https://www.mdpi.com/2227-9717/10/2/291)
Supplement: s1 [file s1 › SupplementaryTable5.xlsx]

## Sheet: Sheet1
Selelected features wise performance measure
Univariate feature selection (UFS), Recursive feature elimination (RFE), Feature selection using SelectFromModel (SFM), Tree-based feature selection (TBFS); For Univariate feature selection (UFS) the methods are chi2, f_classif, mutual_info_classif.
Features with feature selection methods	Vector Length	Method	Sensitivity (%)	Specificity (%)	Accuracy (%)	PPV (%)	MCC	F1 score (%)	AUC
AAC_DC_PAAC_UFS_chi2	44	SVM	72.8	37.4	65.7	83.2	0.086	77.6	0.568
AAC_DC_PAAC_UFS_chi2	44	RF	71.4	48.2	70.4	97	0.077	82.3	0.634
AAC_DC_PAAC_UFS_chi2	44	DNN	74.6	54.1	71.9	91.4	0.211	82.1	0.704
AAC_DC_PAAC_UFS_f_classif	44	SVM	72.8	36.1	64.8	80.5	0.077	76.4	0.55
AAC_DC_PAAC_UFS_f_classif	44	RF	71.2	46.9	70.3	97.2	0.068	82.2	0.631
AAC_DC_PAAC_UFS_f_classif	44	DNN	74.5	56.4	72.6	92.8	0.221	82.6	0.705
AAC_DC_PAAC_UFS_mutual_info_classif	44	SVM	75.1	37.9	62.2	69.1	0.136	71.9	0.604
AAC_DC_PAAC_UFS_mutual_info_classif	44	RF	71.2	46	70.3	97.9	0.056	82.4	0.622
AAC_DC_PAAC_UFS_mutual_info_classif	44	DNN	75.4	53.1	72.1	90	0.233	82	0.714
AAC_DC_PAAC_RFE	44	SVM	71.6	43.2	69.9	94.7	0.079	81.5	0.584
AAC_DC_PAAC_RFE	44	RF	71.4	44.3	70.2	97	0.061	82.3	0.633
AAC_DC_PAAC_RFE	44	DNN	75.2	58.7	73.1	92.6	0.25	83	0.716
AAC_DC_PAAC_SFM	376	SVM	71	50.9	70.6	99.3	0.04	82.8	0.595
AAC_DC_PAAC_SFM	376	RF	71.1	49	70.6	98	0.063	82.4	0.627
AAC_DC_PAAC_SFM	376	DNN	81.6	58.9	75.1	83.8	0.393	82.6	0.796
AAC_DC_PAAC_TBFS	227	SVM	71.4	45.5	70.3	97.2	0.066	82.3	0.604
AAC_DC_PAAC_TBFS	227	RF	71.1	48	70.6	97.9	0.062	82.4	0.628
AAC_DC_PAAC_TBFS	227	DNN	83.3	61.4	77	84.9	0.437	84	0.805
