# Supplementary material
Source: MDPI journal article supplement (https://www.mdpi.com/2227-9717/10/2/291)
Supplement: s1 [file s1 › SupplementaryTable6.xlsx]

## Sheet: Sheet1
Probability score of top 100 bacteria targeted human proteins
Identifier	Probability_BacterialTargeted	Probability_ViralTargeted
O75956	1	1.53026e-28
P15941	1	1.66451e-22
Q9NWB6	1	5.81893e-21
P51861	1	9.77354e-21
O15116	1	2.27813e-19
Q9NWT8	1	2.78817e-19
Q8NDC0	1	9.81128e-19
Q96GE9	1	1.76611e-17
Q96A84	1	9.06137e-17
Q5T0J3	1	9.10701e-17
Q9NXT0	1	9.51596e-17
Q15053	1	3.32227e-15
Q495Z4	1	4.4431e-15
P80511	1	7.61373e-15
P26678	1	1.09808e-14
O15145	1	1.10393e-14
Q9BT09	1	1.23048e-14
Q9H3F6	1	3.0483e-14
Q9Y286	1	3.60334e-14
Q9NTX5	1	4.60436e-14
Q14590	1	1.66679e-13
Q9UII2	1	3.96244e-13
Q9BU40	1	4.70318e-13
Q2TAC2	1	4.7445e-13
Q6NVV7	1	6.3827e-13
Q9H098	1	1.73443e-12
Q8N131	1	2.46427e-12
A6NH11	1	4.65419e-12
Q14586	1	4.77735e-12
O95715	1	5.32621e-12
P48634	1	7.12064e-12
Q6IPW1	1	7.75657e-12
Q969J2	1	8.82028e-12
Q9HCU8	1	9.45756e-12
Q9BUJ0	1	9.66094e-12
P28906	1	1.15332e-11
Q5VZM2	1	1.18846e-11
Q96LW1	1	1.48853e-11
Q9P2A4	1	1.80972e-11
Q5JVG2	1	1.86921e-11
Q96I76	1	2.87573e-11
P13284	1	3.17312e-11
O95780	1	3.85804e-11
O60667	1	4.90059e-11
Q86SE9	1	6.26948e-11
P56555	1	7.41031e-11
Q52M93	1	8.23888e-11
Q8NHJ6	1	1.00099e-10
Q12918	1	1.1067e-10
Q9HCG8	1	1.15113e-10
Q5TD97	1	1.16825e-10
Q9NUV9	1	1.45435e-10
Q8IUX1	1	1.46182e-10
Q9H8J5	1	1.54374e-10
P40967	1	1.55226e-10
Q9UIE0	1	1.72792e-10
Q9NWQ8	1	1.80776e-10
O95859	1	1.96688e-10
Q5T200	1	2.10544e-10
P0C1Z6	1	2.11714e-10
Q14242	1	2.77356e-10
P19961	1	3.2334e-10
Q9BTL4	1	3.47829e-10
Q9UBC2	1	3.49864e-10
Q8N1N0	1	3.58745e-10
Q9NTZ6	1	3.70403e-10
O43924	1	4.13605e-10
Q9BU02	1	4.20631e-10
P13224	1	4.23422e-10
Q9NQX5	1	4.29073e-10
Q96QB1	1	4.34329e-10
O75716	1	4.75583e-10
Q9Y3C8	1	5.82263e-10
Q15019	1	6.1421e-10
Q9NZM4	1	6.73629e-10
P78364	1	6.92101e-10
Q13106	1	7.30762e-10
Q96QF7	1	7.36423e-10
Q96J88	1	7.72784e-10
P55039	1	8.53653e-10
Q9BT23	1	8.90538e-10
Q9HCI5	1	9.37059e-10
Q9UKN5	1	1.03678e-09
P01210	1	1.05381e-09
Q99519	1	1.26059e-09
O95947	1	1.26247e-09
Q92575	1	1.30333e-09
Q7Z422	1	1.30713e-09
O75298	1	1.47925e-09
Q96SE7	1	1.50087e-09
Q96ND0	1	1.68441e-09
Q6P531	1	1.78644e-09
P51888	1	2.00299e-09
Q8TCX5	1	2.31414e-09
P35680	1	2.47062e-09
Q9Y4M8	1	2.49387e-09
Q9H6X2	1	3.29345e-09
Q8N283	1	3.47301e-09
Q15486	1	3.58732e-09
Q8NA92	1	4.15215e-09
