# Supplementary material
Source: MDPI journal article supplement (https://www.mdpi.com/2227-9717/10/2/291)
Supplement: s1 [file s1 › SupplementaryTable7.xlsx]

## Sheet: Sheet1
Probability score of top 100 virus targeted human proteins
Identifier	Probability_BacterialTargeted	Probability_ViralTargeted
Q9Y2S6	0	1
Q16718	0	1
O75964	0	1
O00483	0	1
Q96EH5	0	1
P13645	0	1
Q52LJ0	0	1
P03905	0	1
P62841	0	1
P19012	0	1
Q9BY27	0	1
P02538	0	1
O60565	0	1
O43805	0	1
Q00059	0	1
P49760	0	1
P08779	0	1
P35527	0	1
Q9BQB6	0	1
P98172	0	1
Q6UWN8	0	1
P55774	0	1
P04264	0	1
O95183	0	1
P07108	0	1
Q14512	0	1
P62273	0	1
P21291	0	1
Q15415	0	1
Q8IUC0	0	1
Q12846	0	1
P61927	0	1
P60059	0	1
P05114	0	1
P52926	0	1
P23297	0	1
P16403	0	1
Q567V2	0	1
Q13901	0	1
O75352	0	1
P04259	0	1
O96011	0	1
P02533	0	1
Q9P0J6	0	1
Q9Y291	0	1
Q8N4H5	0	1
P15954	0	1
O14949	0	1
Q9H875	0	1
P26447	0	1
P53701	0	1
Q9Y3E0	0	1
P62891	0	1
P69892	0	1
Q8IYN2	0	1
P82980	0	1
P20930	0	1
P56378	0	1
P17900	0	1
Q96ES6	0	1
P63218	0	1
P29034	0	1
Q13084	0	1
Q5HYJ3	0	1
A6ZKI3	0	1
P10176	0	1
Q9BSY4	0	1
Q92876	0	1
Q8WW24	0	1
Q6ZUT1	0	1
Q8N5F7	0	1
Q5M9Q1	0	1
Q8WVL7	0	1
Q14210	0	1
P62945	0	1
Q3B726	0	1
P60602	0	1
Q86WA6	0	1
Q6YP21	0	1
P62633	0	1
O95971	0	1
O14548	0	1
P82909	0	1
P58546	0	1
P56277	0	1
Q1ED39	0	1
O75431	0	1
Q96EE4	0	1
O14633	0	1
Q96D21	0	1
Q6P161	0	1
P56381	0	1
Q2M2I5	0	1
Q9Y2R5	0	1
Q15054	0	1
P35900	0	1
P61165	0	1
Q8N9F7	0	1
Q8WWF6	0	1
Q7Z7F7	0	1
