# Supplementary material
Source: MDPI journal article supplement (https://www.mdpi.com/2227-9717/10/2/291)

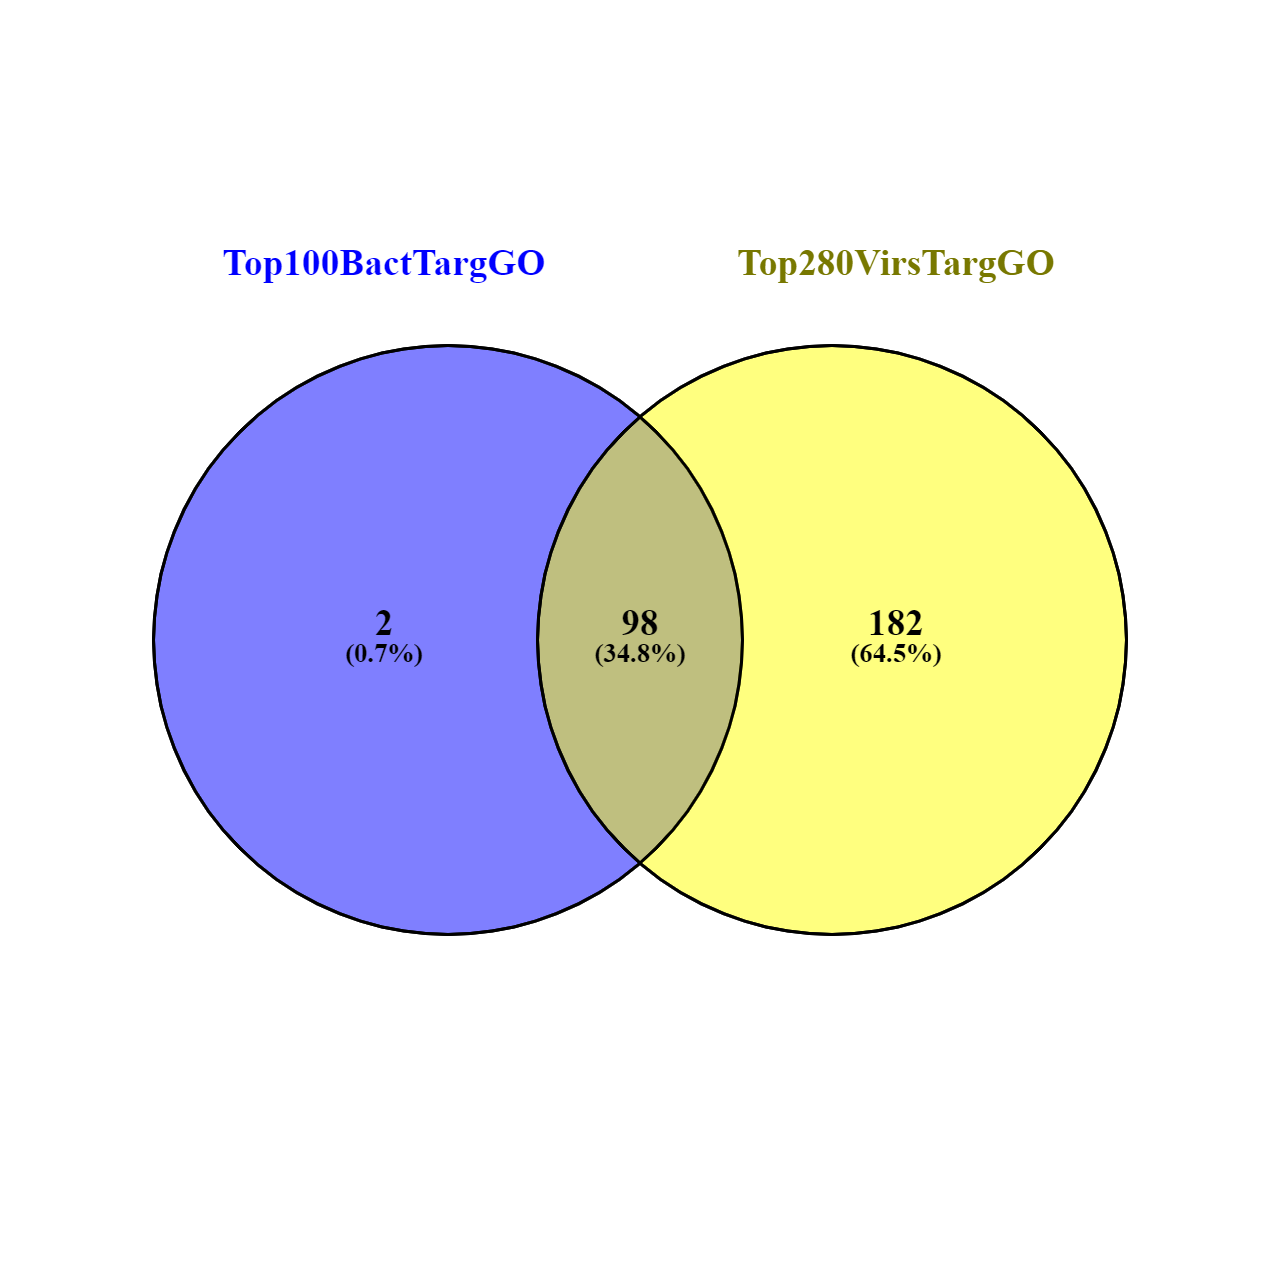

Supplement: s1 [file s1 › FigS1.tif]
